# Supplementary material
Source: publisher figshare collection journal article supplement (https://acs.figshare.com/ndownloader/files/5154700)
Supplement: Supplementary file 1 [file 5154700]

 
data_kk634 
 
_audit_creation_method            SHELXL-97 
_chemical_name_systematic 
; 
 ? 
; 
_chemical_name_common             ? 
_chemical_melting_point           ? 
_chemical_formula_moiety          ? 
_chemical_formula_sum 
 'C22 H24 O2' 
_chemical_formula_weight          320.41 
 
loop_ 
 _atom_type_symbol 
 _atom_type_description 
 _atom_type_scat_dispersion_real 
 _atom_type_scat_dispersion_imag 
 _atom_type_scat_source 
 'C'  'C'   0.0033   0.0016 
 'International Tables Vol C Tables 4.2.6.8 and 6.1.1.4' 
 'H'  'H'   0.0000   0.0000 
 'International Tables Vol C Tables 4.2.6.8 and 6.1.1.4' 
 'O'  'O'   0.0106   0.0060 
 'International Tables Vol C Tables 4.2.6.8 and 6.1.1.4' 
 
_symmetry_cell_setting            Orthorhombic 
_symmetry_space_group_name_H-M    Pca21
 
loop_ 
 _symmetry_equiv_pos_as_xyz 
 'x, y, z' 
 '-x, -y, z+1/2' 
 'x+1/2, -y, z' 
 '-x+1/2, y, z+1/2' 
 
_cell_length_a                    16.9116(3) 
_cell_length_b                    5.56190(10) 
_cell_length_c                    36.4494(8) 
_cell_angle_alpha                 90.00 
_cell_angle_beta                  90.00 
_cell_angle_gamma                 90.00 
_cell_volume                      3428.45(11) 
_cell_formula_units_Z             8 
_cell_measurement_temperature     223(2) 
_cell_measurement_reflns_used     ? 
_cell_measurement_theta_min       ? 
_cell_measurement_theta_max       ? 
 
_exptl_crystal_description        needles 
_exptl_crystal_colour             colorless
_exptl_crystal_size_max           0.60 
_exptl_crystal_size_mid           0.17 
_exptl_crystal_size_min           0.12 
_exptl_crystal_density_meas       ? 
_exptl_crystal_density_diffrn     1.242 
_exptl_crystal_density_method     'not measured' 
_exptl_crystal_F_000              1376 
_exptl_absorpt_coefficient_mu     0.078 
_exptl_absorpt_correction_type    none 
_exptl_absorpt_correction_T_min   ? 
_exptl_absorpt_correction_T_max   ? 
_exptl_absorpt_process_details    ? 
 
_exptl_special_details 
; 
 ? 
; 
 
_diffrn_ambient_temperature       223(2) 
_diffrn_radiation_wavelength      0.71073 
_diffrn_radiation_type            MoK\a 
_diffrn_radiation_source          'fine-focus sealed tube' 
_diffrn_radiation_monochromator   graphite 
_diffrn_measurement_device_type   'Nonius Kappa CCD' 
_diffrn_measurement_method        \w-scans
_diffrn_detector_area_resol_mean  ? 
_diffrn_standards_number          ? 
_diffrn_standards_interval_count  ? 
_diffrn_standards_interval_time   ? 
_diffrn_standards_decay_%         ? 
_diffrn_reflns_number             7195 
_diffrn_reflns_av_R_equivalents   0.0000 
_diffrn_reflns_av_sigmaI/netI     0.1390 
_diffrn_reflns_limit_h_min        -21 
_diffrn_reflns_limit_h_max        21 
_diffrn_reflns_limit_k_min        -7 
_diffrn_reflns_limit_k_max        7 
_diffrn_reflns_limit_l_min        -47 
_diffrn_reflns_limit_l_max        46 
_diffrn_reflns_theta_min          2.93 
_diffrn_reflns_theta_max          27.48 
_reflns_number_total              7195 
_reflns_number_gt                 3717 
_reflns_threshold_expression      >2sigma(I) 
 
_publ_section_references
;
Altomare A., Burla M.C., Camalli M., Cascarano G.L., Giacovazzo C., 
Guagliardi A., Moliterni A.G.G., Polidori G.,Spagna R. Sir97.  
(1999) J. Appl. Cryst. 32, 115-119.

Otwinowski, Z. and Minor, W.  (1997).  Methods in Enzymology,
276, Macromolecular Crystallography, part A, 307-326, C. W. Carter,
Jr. and R. M. Sweets, Eds., Academic Press.

Sheldrick, G. M.  (1998).  SHELXTL/PC.  Release 5.10.  Siemens 
Analytical X-ray Instruments, Inc., Madison, WI, USA.


;
_computing_data_collection        'Collect software, Nonius B.V. 1998'
_computing_cell_refinement        'Collect software, Nonius B.V. 1998'
_computing_data_reduction         
;
DENZO and Scalepack (Otwinoski and Minor, 1997)
;
_computing_structure_solution     
;

SIR97 - Altomare A., Burla M.C., Camalli M., Cascarano G.L., Giacovazzo C., 
Guagliardi A., Moliterni A.G.G., Polidori G.,Spagna R.
;
_computing_structure_refinement   'XL SHELXTL/PC, Siemens Analytical'
_computing_molecular_graphics     'XP SHELXTL/PC, Siemens Analytical' 
_computing_publication_material   ? 

 
_refine_special_details 
; 
 Refinement of F^2^ against ALL reflections.  The weighted R-factor wR and 
 goodness of fit S are based on F^2^, conventional R-factors R are based 
 on F, with F set to zero for negative F^2^. The threshold expression of 
 F^2^ > 2sigma(F^2^) is used only for calculating R-factors(gt) etc. and is 
 not relevant to the choice of reflections for refinement.  R-factors based 
 on F^2^ are statistically about twice as large as those based on F, and R- 
 factors based on ALL data will be even larger. 
; 
 
_refine_ls_structure_factor_coef  Fsqd  
_refine_ls_matrix_type            full 
_refine_ls_weighting_scheme       calc  
_refine_ls_weighting_details 
 'calc w=1/[\s^2^(Fo^2^)+(0.0578P)^2^+0.0000P] where P=(Fo^2^+2Fc^2^)/3' 
_atom_sites_solution_primary      direct 
_atom_sites_solution_secondary    difmap 
_atom_sites_solution_hydrogens    geom 
_refine_ls_hydrogen_treatment     mixed 
_refine_ls_extinction_method      SHELXL 
_refine_ls_extinction_coef        0.0117(9) 
_refine_ls_extinction_expression 
 'Fc^*^=kFc[1+0.001xFc^2^\l^3^/sin(2\q)]^-1/4^' 
_refine_ls_abs_structure_details 
 'Flack H D (1983), Acta Cryst. A39, 876-881' 
_refine_ls_abs_structure_Flack    -0.9(16) 
_refine_ls_number_reflns          7195 
_refine_ls_number_parameters      434 
_refine_ls_number_restraints      1 
_refine_ls_R_factor_all           0.1559 
_refine_ls_R_factor_gt            0.0574 
_refine_ls_wR_factor_ref          0.1319 
_refine_ls_wR_factor_gt           0.1037 
_refine_ls_goodness_of_fit_ref    0.956 
_refine_ls_restrained_S_all       0.956 
_refine_ls_shift/su_max           0.012 
_refine_ls_shift/su_mean          0.000 
 
loop_ 
 _atom_site_label 
 _atom_site_type_symbol 
 _atom_site_fract_x 
 _atom_site_fract_y 
 _atom_site_fract_z 
 _atom_site_U_iso_or_equiv 
 _atom_site_adp_type 
 _atom_site_occupancy 
 _atom_site_symmetry_multiplicity 
 _atom_site_calc_flag 
 _atom_site_refinement_flags 
 _atom_site_disorder_assembly 
 _atom_site_disorder_group 
C1 C 0.74718(19) 0.2523(5) 0.38053(10) 0.0231(8) Uani 1 1 d . . . 
H1 H 0.7583 0.4053 0.3695 0.028 Uiso 1 1 d R . . 
C2 C 0.75038(19) 0.0572(6) 0.35027(10) 0.0243(8) Uani 1 1 d . . . 
H2 H 0.7348 -0.0940 0.3607 0.029 Uiso 1 1 d R . . 
C3 C 0.8336(2) 0.0281(6) 0.33392(10) 0.0277(9) Uani 1 1 d . . . 
H3 H 0.8468 0.1779 0.3224 0.033 Uiso 1 1 d R . . 
C4 C 0.8942(2) -0.0178(6) 0.36432(11) 0.0331(9) Uani 1 1 d . . . 
H4A H 0.9460 -0.0315 0.3538 0.040 Uiso 1 1 d R . . 
H4B H 0.8815 -0.1672 0.3761 0.040 Uiso 1 1 d R . . 
C5 C 0.8922(2) 0.1791(6) 0.39303(11) 0.0325(9) Uani 1 1 d . . . 
H5A H 0.9058 0.3273 0.3811 0.039 Uiso 1 1 d R . . 
H5B H 0.9307 0.1492 0.4119 0.039 Uiso 1 1 d R . . 
C6 C 0.8100(2) 0.2037(7) 0.40961(10) 0.0322(9) Uani 1 1 d . . . 
H6A H 0.7963 0.0560 0.4217 0.039 Uiso 1 1 d R . . 
H6B H 0.8103 0.3296 0.4276 0.039 Uiso 1 1 d R . . 
C7 C 0.66475(19) 0.2645(6) 0.39746(10) 0.0271(8) Uani 1 1 d . . . 
H7A H 0.6586 0.1234 0.4123 0.033 Uiso 1 1 d R . . 
H7B H 0.6261 0.2573 0.3782 0.033 Uiso 1 1 d R . . 
C8 C 0.6491(2) 0.4827(6) 0.42121(10) 0.0263(8) Uani 1 1 d . . . 
O9 O 0.69625(15) 0.6497(4) 0.42241(7) 0.0355(6) Uani 1 1 d . . . 
C10 C 0.5742(2) 0.4933(6) 0.44275(10) 0.0230(8) Uani 1 1 d . . . 
C11 C 0.5632(2) 0.6833(7) 0.46743(11) 0.0296(10) Uani 1 1 d . . . 
H11 H 0.6028 0.8063 0.4696 0.036 Uiso 1 1 d R . . 
C12 C 0.4940(2) 0.6967(7) 0.48788(11) 0.0336(9) Uani 1 1 d . . . 
H12 H 0.4862 0.8271 0.5048 0.040 Uiso 1 1 d R . . 
C13 C 0.4363(2) 0.5261(7) 0.48403(10) 0.0332(9) Uani 1 1 d . . . 
H13 H 0.3892 0.5328 0.4987 0.040 Uiso 1 1 d R . . 
C14 C 0.4463(2) 0.3399(7) 0.45916(11) 0.0358(10) Uani 1 1 d . . . 
H14 H 0.4051 0.2235 0.4555 0.043 Uiso 1 1 d R . . 
C15 C 0.5146(2) 0.3218(6) 0.43889(10) 0.0302(9) Uani 1 1 d . . . 
H15 H 0.5202 0.1914 0.4218 0.036 Uiso 1 1 d R . . 
C16 C 0.6936(2) 0.1208(7) 0.31939(10) 0.0244(9) Uani 1 1 d . . . 
O17 O 0.70474(13) 0.3069(4) 0.30218(7) 0.0338(6) Uani 1 1 d . . . 
C18 C 0.62463(19) -0.0369(6) 0.30988(10) 0.0245(8) Uani 1 1 d . . . 
C19 C 0.5807(2) 0.0214(7) 0.27875(10) 0.0318(9) Uani 1 1 d . . . 
H19 H 0.5952 0.1609 0.2648 0.038 Uiso 1 1 d R . . 
C20 C 0.5169(2) -0.1213(7) 0.26853(11) 0.0332(9) Uani 1 1 d . . . 
H20 H 0.4862 -0.0792 0.2473 0.040 Uiso 1 1 d R . . 
C21 C 0.4968(2) -0.3200(7) 0.28900(11) 0.0312(9) Uani 1 1 d . . . 
H21 H 0.4533 -0.4206 0.2820 0.037 Uiso 1 1 d R . . 
C22 C 0.5400(2) -0.3773(6) 0.31978(11) 0.0333(9) Uani 1 1 d . . . 
H22 H 0.5261 -0.5119 0.3349 0.040 Uiso 1 1 d R . . 
C23 C 0.6033(2) -0.2359(6) 0.33039(11) 0.0294(9) Uani 1 1 d . . . 
H23 H 0.6344 -0.2770 0.3515 0.035 Uiso 1 1 d R . . 
C24 C 0.8362(2) -0.1699(6) 0.30500(11) 0.0338(9) Uani 1 1 d . . . 
H24A H 0.7986 -0.1406 0.2858 0.051 Uiso 1 1 d R . . 
H24B H 0.8885 -0.1754 0.2948 0.051 Uiso 1 1 d R . . 
H24C H 0.8244 -0.3206 0.3166 0.051 Uiso 1 1 d R . . 
C1' C 0.4537(2) 0.7435(6) 0.61441(9) 0.0243(8) Uani 1 1 d . . . 
H1' H 0.4415 0.8944 0.6259 0.029 Uiso 1 1 d R . . 
C2' C 0.4515(2) 0.5481(6) 0.64450(10) 0.0237(8) Uani 1 1 d . . . 
H2' H 0.4665 0.3976 0.6336 0.028 Uiso 1 1 d R . . 
C3' C 0.36751(19) 0.5209(6) 0.66064(10) 0.0285(9) Uani 1 1 d . . . 
H3' H 0.3542 0.6703 0.6723 0.034 Uiso 1 1 d R . . 
C4' C 0.3071(2) 0.4781(6) 0.63030(10) 0.0312(9) Uani 1 1 d . . . 
H4'A H 0.2553 0.4680 0.6410 0.037 Uiso 1 1 d R . . 
H4'B H 0.3189 0.3269 0.6188 0.037 Uiso 1 1 d R . . 
C5' C 0.3087(2) 0.6758(6) 0.60162(11) 0.0326(9) Uani 1 1 d . . . 
H5'A H 0.2959 0.8264 0.6130 0.039 Uiso 1 1 d R . . 
H5'B H 0.2706 0.6454 0.5826 0.039 Uiso 1 1 d R . . 
C6' C 0.39121(19) 0.6966(6) 0.58531(10) 0.0292(9) Uani 1 1 d . . . 
H6'A H 0.4034 0.5460 0.5737 0.035 Uiso 1 1 d R . . 
H6'B H 0.3932 0.8201 0.5669 0.035 Uiso 1 1 d R . . 
C7' C 0.53701(19) 0.7594(6) 0.59729(10) 0.0252(8) Uani 1 1 d . . . 
H7'A H 0.5454 0.6180 0.5827 0.030 Uiso 1 1 d R . . 
H7'B H 0.5749 0.7569 0.6169 0.030 Uiso 1 1 d R . . 
C8' C 0.5523(2) 0.9793(6) 0.57405(9) 0.0253(8) Uani 1 1 d . . . 
O9' O 0.50497(15) 1.1447(4) 0.57280(7) 0.0364(7) Uani 1 1 d . . . 
C10' C 0.6270(2) 0.9936(6) 0.55239(10) 0.0249(8) Uani 1 1 d . . . 
C11' C 0.6373(2) 1.1818(6) 0.52768(10) 0.0290(9) Uani 1 1 d . . . 
H11' H 0.5958 1.2983 0.5249 0.035 Uiso 1 1 d R . . 
C12' C 0.7060(2) 1.1991(6) 0.50724(11) 0.0335(9) Uani 1 1 d . . . 
H12' H 0.7117 1.3287 0.4900 0.040 Uiso 1 1 d R . . 
C13' C 0.7657(2) 1.0296(6) 0.51120(11) 0.0354(10) Uani 1 1 d . . . 
H13' H 0.8143 1.0459 0.4978 0.043 Uiso 1 1 d R . . 
C14' C 0.7559(2) 0.8418(7) 0.53540(12) 0.0345(10) Uani 1 1 d . . . 
H14' H 0.7964 0.7216 0.5375 0.041 Uiso 1 1 d R . . 
C15' C 0.6873(2) 0.8231(7) 0.55614(10) 0.0318(9) Uani 1 1 d . . . 
H15' H 0.6800 0.6922 0.5730 0.038 Uiso 1 1 d R . . 
C16' C 0.5080(2) 0.6142(6) 0.67506(10) 0.0258(8) Uani 1 1 d . . . 
O17' O 0.49564(14) 0.8006(4) 0.69240(7) 0.0350(7) Uani 1 1 d . . . 
C18' C 0.5776(2) 0.4627(6) 0.68541(10) 0.0249(9) Uani 1 1 d . . . 
C19' C 0.6230(2) 0.5305(6) 0.71545(10) 0.0312(9) Uani 1 1 d . . . 
H19' H 0.6104 0.6777 0.7279 0.037 Uiso 1 1 d R . . 
C20' C 0.6864(2) 0.3929(7) 0.72703(11) 0.0358(10) Uani 1 1 d . . . 
H20' H 0.7163 0.4412 0.7482 0.043 Uiso 1 1 d R . . 
C21' C 0.7056(2) 0.1850(7) 0.70817(12) 0.0390(10) Uani 1 1 d . . . 
H21' H 0.7489 0.0875 0.7164 0.047 Uiso 1 1 d R . . 
C22' C 0.6623(2) 0.1150(6) 0.67786(11) 0.0348(10) Uani 1 1 d . . . 
H22' H 0.6762 -0.0295 0.6650 0.042 Uiso 1 1 d R . . 
C23' C 0.5980(2) 0.2543(6) 0.66626(12) 0.0317(10) Uani 1 1 d . . . 
H23' H 0.5685 0.2095 0.6448 0.038 Uiso 1 1 d R . . 
C24' C 0.3648(2) 0.3221(6) 0.68954(11) 0.0384(10) Uani 1 1 d . . . 
H24D H 0.3129 0.3093 0.7000 0.058 Uiso 1 1 d R . . 
H24E H 0.3787 0.1727 0.6780 0.058 Uiso 1 1 d R . . 
H24F H 0.4023 0.3578 0.7085 0.058 Uiso 1 1 d R . . 
 
loop_ 
 _atom_site_aniso_label 
 _atom_site_aniso_U_11 
 _atom_site_aniso_U_22 
 _atom_site_aniso_U_33 
 _atom_site_aniso_U_23 
 _atom_site_aniso_U_13 
 _atom_site_aniso_U_12 
C1 0.0242(18) 0.0221(18) 0.023(2) -0.0014(14) 0.0030(16) -0.0015(15) 
C2 0.027(2) 0.0244(18) 0.021(2) 0.0027(16) -0.0004(16) -0.0017(15) 
C3 0.031(2) 0.024(2) 0.028(2) -0.0001(17) 0.0034(18) -0.0021(15) 
C4 0.0258(19) 0.030(2) 0.043(3) -0.0012(18) 0.005(2) 0.0061(17) 
C5 0.0221(18) 0.039(2) 0.036(2) 0.0018(18) -0.0019(17) -0.0006(17) 
C6 0.030(2) 0.038(2) 0.029(2) -0.0016(17) -0.0017(18) -0.0031(17) 
C7 0.029(2) 0.029(2) 0.023(2) 0.0009(16) 0.0008(16) -0.0032(16) 
C8 0.032(2) 0.0222(19) 0.025(2) 0.0015(18) -0.0030(18) 0.0032(17) 
O9 0.0389(15) 0.0281(14) 0.0396(17) -0.0052(13) 0.0077(13) -0.0076(13) 
C10 0.0266(19) 0.0219(19) 0.020(2) 0.0026(16) -0.0011(15) 0.0027(16) 
C11 0.031(2) 0.032(2) 0.025(2) -0.0023(18) -0.0015(19) 0.0009(17) 
C12 0.036(2) 0.037(2) 0.028(2) -0.0044(18) 0.0001(18) 0.0073(18) 
C13 0.032(2) 0.043(2) 0.025(2) 0.0028(19) 0.0024(17) 0.0020(18) 
C14 0.027(2) 0.037(2) 0.044(3) 0.000(2) 0.0018(19) 0.0022(17) 
C15 0.033(2) 0.026(2) 0.031(2) 0.0001(17) 0.0011(18) 0.0013(17) 
C16 0.032(2) 0.021(2) 0.020(2) -0.0030(17) 0.0034(17) 0.0026(17) 
O17 0.0380(15) 0.0322(15) 0.0312(17) 0.0073(13) -0.0005(12) -0.0012(12) 
C18 0.0236(18) 0.025(2) 0.025(2) -0.0015(16) 0.0041(16) 0.0044(15) 
C19 0.034(2) 0.035(2) 0.026(2) 0.0022(18) -0.0009(18) -0.0009(18) 
C20 0.035(2) 0.039(2) 0.026(2) -0.0031(19) -0.0014(17) 0.0029(18) 
C21 0.026(2) 0.035(2) 0.032(2) -0.0041(18) -0.0041(18) -0.0017(16) 
C22 0.034(2) 0.029(2) 0.037(2) 0.0018(17) -0.002(2) -0.0086(17) 
C23 0.029(2) 0.032(2) 0.027(2) 0.0001(18) -0.0019(17) -0.0004(16) 
C24 0.036(2) 0.029(2) 0.037(2) -0.0038(19) 0.0027(19) -0.0007(17) 
C1' 0.028(2) 0.0232(18) 0.021(2) -0.0010(14) -0.0003(15) -0.0002(15) 
C2' 0.0217(19) 0.0249(19) 0.024(2) -0.0017(17) 0.0016(17) 0.0020(16) 
C3' 0.028(2) 0.027(2) 0.030(2) 0.0003(17) 0.0043(17) -0.0016(16) 
C4' 0.0303(19) 0.0276(19) 0.036(2) 0.0004(17) -0.0027(19) 0.0004(16) 
C5' 0.029(2) 0.031(2) 0.037(2) 0.0009(17) -0.0075(18) -0.0016(17) 
C6' 0.031(2) 0.029(2) 0.027(2) 0.0027(16) -0.0064(17) 0.0015(16) 
C7' 0.0243(19) 0.0291(19) 0.022(2) -0.0001(16) -0.0015(16) 0.0003(15) 
C8' 0.032(2) 0.0232(19) 0.020(2) -0.0047(17) 0.0007(17) -0.0008(18) 
O9' 0.0370(15) 0.0311(14) 0.0409(18) 0.0019(13) 0.0092(13) 0.0075(13) 
C10' 0.029(2) 0.023(2) 0.023(2) -0.0029(17) -0.0017(15) -0.0033(16) 
C11' 0.034(2) 0.028(2) 0.024(2) 0.0001(18) -0.0056(18) 0.0010(17) 
C12' 0.038(2) 0.035(2) 0.027(2) 0.0030(18) 0.0002(18) -0.0046(19) 
C13' 0.033(2) 0.041(2) 0.032(2) -0.0012(19) 0.0052(18) -0.0046(19) 
C14' 0.031(2) 0.036(2) 0.037(3) 0.001(2) 0.008(2) 0.0041(18) 
C15' 0.034(2) 0.032(2) 0.029(2) 0.0044(17) 0.0043(18) 0.0032(18) 
C16' 0.028(2) 0.029(2) 0.020(2) -0.0003(18) 0.0055(17) 0.0002(16) 
O17' 0.0397(16) 0.0314(14) 0.0340(17) -0.0089(13) -0.0052(12) 0.0060(12) 
C18' 0.031(2) 0.0230(19) 0.021(2) 0.0017(16) 0.0008(17) -0.0021(16) 
C19' 0.032(2) 0.035(2) 0.027(2) 0.0024(18) 0.0014(18) -0.0018(17) 
C20' 0.031(2) 0.046(3) 0.031(3) 0.006(2) -0.0051(18) 0.0004(19) 
C21' 0.031(2) 0.042(2) 0.043(3) 0.016(2) 0.001(2) 0.0039(18) 
C22' 0.031(2) 0.031(2) 0.043(3) -0.0018(18) 0.003(2) -0.0025(17) 
C23' 0.030(2) 0.030(2) 0.035(3) -0.0040(19) -0.0055(19) 0.0009(18) 
C24' 0.037(2) 0.039(2) 0.038(2) 0.009(2) 0.0031(19) -0.0059(18) 
 
_geom_special_details 
; 
 All esds (except the esd in the dihedral angle between two l.s. planes) 
 are estimated using the full covariance matrix.  The cell esds are taken 
 into account individually in the estimation of esds in distances, angles 
 and torsion angles; correlations between esds in cell parameters are only 
 used when they are defined by crystal symmetry.  An approximate (isotropic) 
 treatment of cell esds is used for estimating esds involving l.s. planes. 
; 
 
loop_ 
 _geom_bond_atom_site_label_1 
 _geom_bond_atom_site_label_2 
 _geom_bond_distance 
 _geom_bond_site_symmetry_2 
 _geom_bond_publ_flag 
C1 C6 1.525(5) . ? 
C1 C7 1.526(5) . ? 
C1 C2 1.548(5) . ? 
C1 H1 0.9600 . ? 
C2 C16 1.521(5) . ? 
C2 C3 1.537(5) . ? 
C2 H2 0.9600 . ? 
C3 C24 1.525(5) . ? 
C3 C4 1.531(5) . ? 
C3 H3 0.9600 . ? 
C4 C5 1.515(5) . ? 
C4 H4A 0.9600 . ? 
C4 H4B 0.9600 . ? 
C5 C6 1.523(5) . ? 
C5 H5A 0.9601 . ? 
C5 H5B 0.9600 . ? 
C6 H6A 0.9599 . ? 
C6 H6B 0.9599 . ? 
C7 C8 1.514(5) . ? 
C7 H7A 0.9599 . ? 
C7 H7B 0.9599 . ? 
C8 O9 1.225(4) . ? 
C8 C10 1.492(5) . ? 
C10 C15 1.395(5) . ? 
C10 C11 1.400(5) . ? 
C11 C12 1.389(5) . ? 
C11 H11 0.9600 . ? 
C12 C13 1.368(5) . ? 
C12 H12 0.9599 . ? 
C13 C14 1.387(5) . ? 
C13 H13 0.9601 . ? 
C14 C15 1.375(5) . ? 
C14 H14 0.9600 . ? 
C15 H15 0.9600 . ? 
C16 O17 1.225(4) . ? 
C16 C18 1.501(5) . ? 
C18 C23 1.383(5) . ? 
C18 C19 1.395(5) . ? 
C19 C20 1.390(5) . ? 
C19 H19 0.9600 . ? 
C20 C21 1.376(5) . ? 
C20 H20 0.9600 . ? 
C21 C22 1.377(5) . ? 
C21 H21 0.9599 . ? 
C22 C23 1.383(5) . ? 
C22 H22 0.9601 . ? 
C23 H23 0.9600 . ? 
C24 H24A 0.9601 . ? 
C24 H24B 0.9600 . ? 
C24 H24C 0.9600 . ? 
C1' C6' 1.520(5) . ? 
C1' C7' 1.544(5) . ? 
C1' C2' 1.544(5) . ? 
C1' H1' 0.9599 . ? 
C2' C16' 1.514(5) . ? 
C2' C3' 1.544(4) . ? 
C2' H2' 0.9601 . ? 
C3' C4' 1.524(5) . ? 
C3' C24' 1.528(5) . ? 
C3' H3' 0.9599 . ? 
C4' C5' 1.518(5) . ? 
C4' H4'A 0.9600 . ? 
C4' H4'B 0.9600 . ? 
C5' C6' 1.521(5) . ? 
C5' H5'A 0.9599 . ? 
C5' H5'B 0.9601 . ? 
C6' H6'A 0.9601 . ? 
C6' H6'B 0.9600 . ? 
C7' C8' 1.510(5) . ? 
C7' H7'A 0.9599 . ? 
C7' H7'B 0.9602 . ? 
C8' O9' 1.220(4) . ? 
C8' C10' 1.492(5) . ? 
C10' C11' 1.392(5) . ? 
C10' C15' 1.398(5) . ? 
C11' C12' 1.384(5) . ? 
C11' H11' 0.9599 . ? 
C12' C13' 1.388(5) . ? 
C12' H12' 0.9599 . ? 
C13' C14' 1.377(5) . ? 
C13' H13' 0.9599 . ? 
C14' C15' 1.389(5) . ? 
C14' H14' 0.9600 . ? 
C15' H15' 0.9600 . ? 
C16' O17' 1.232(4) . ? 
C16' C18' 1.495(5) . ? 
C18' C19' 1.390(5) . ? 
C18' C23' 1.396(5) . ? 
C19' C20' 1.383(5) . ? 
C19' H19' 0.9600 . ? 
C20' C21' 1.384(5) . ? 
C20' H20' 0.9601 . ? 
C21' C22' 1.381(6) . ? 
C21' H21' 0.9600 . ? 
C22' C23' 1.401(5) . ? 
C22' H22' 0.9599 . ? 
C23' H23' 0.9601 . ? 
C24' H24D 0.9600 . ? 
C24' H24E 0.9601 . ? 
C24' H24F 0.9600 . ? 
 
loop_ 
 _geom_angle_atom_site_label_1 
 _geom_angle_atom_site_label_2 
 _geom_angle_atom_site_label_3 
 _geom_angle 
 _geom_angle_site_symmetry_1 
 _geom_angle_site_symmetry_3 
 _geom_angle_publ_flag 
C6 C1 C7 111.3(3) . . ? 
C6 C1 C2 110.3(3) . . ? 
C7 C1 C2 110.6(3) . . ? 
C6 C1 H1 108.1 . . ? 
C7 C1 H1 108.0 . . ? 
C2 C1 H1 108.4 . . ? 
C16 C2 C3 108.4(3) . . ? 
C16 C2 C1 110.0(3) . . ? 
C3 C2 C1 112.5(3) . . ? 
C16 C2 H2 108.9 . . ? 
C3 C2 H2 108.2 . . ? 
C1 C2 H2 108.7 . . ? 
C24 C3 C4 111.2(3) . . ? 
C24 C3 C2 111.7(3) . . ? 
C4 C3 C2 110.5(3) . . ? 
C24 C3 H3 108.5 . . ? 
C4 C3 H3 107.9 . . ? 
C2 C3 H3 107.0 . . ? 
C5 C4 C3 111.4(3) . . ? 
C5 C4 H4A 110.7 . . ? 
C3 C4 H4A 109.6 . . ? 
C5 C4 H4B 108.1 . . ? 
C3 C4 H4B 108.7 . . ? 
H4A C4 H4B 108.4 . . ? 
C4 C5 C6 111.0(3) . . ? 
C4 C5 H5A 107.6 . . ? 
C6 C5 H5A 108.8 . . ? 
C4 C5 H5B 110.7 . . ? 
C6 C5 H5B 110.6 . . ? 
H5A C5 H5B 108.1 . . ? 
C5 C6 C1 112.1(3) . . ? 
C5 C6 H6A 109.0 . . ? 
C1 C6 H6A 107.6 . . ? 
C5 C6 H6B 109.4 . . ? 
C1 C6 H6B 110.5 . . ? 
H6A C6 H6B 108.2 . . ? 
C8 C7 C1 115.3(3) . . ? 
C8 C7 H7A 108.3 . . ? 
C1 C7 H7A 106.9 . . ? 
C8 C7 H7B 109.4 . . ? 
C1 C7 H7B 109.0 . . ? 
H7A C7 H7B 107.8 . . ? 
O9 C8 C10 120.3(3) . . ? 
O9 C8 C7 120.9(3) . . ? 
C10 C8 C7 118.8(3) . . ? 
C15 C10 C11 119.0(3) . . ? 
C15 C10 C8 122.2(3) . . ? 
C11 C10 C8 118.7(3) . . ? 
C12 C11 C10 119.8(3) . . ? 
C12 C11 H11 120.3 . . ? 
C10 C11 H11 119.9 . . ? 
C13 C12 C11 120.5(4) . . ? 
C13 C12 H12 119.4 . . ? 
C11 C12 H12 120.0 . . ? 
C12 C13 C14 119.9(3) . . ? 
C12 C13 H13 120.5 . . ? 
C14 C13 H13 119.6 . . ? 
C15 C14 C13 120.5(3) . . ? 
C15 C14 H14 119.0 . . ? 
C13 C14 H14 120.4 . . ? 
C14 C15 C10 120.2(3) . . ? 
C14 C15 H15 119.1 . . ? 
C10 C15 H15 120.7 . . ? 
O17 C16 C18 119.7(3) . . ? 
O17 C16 C2 118.6(3) . . ? 
C18 C16 C2 121.7(3) . . ? 
C23 C18 C19 119.1(3) . . ? 
C23 C18 C16 123.1(3) . . ? 
C19 C18 C16 117.8(3) . . ? 
C20 C19 C18 119.9(3) . . ? 
C20 C19 H19 121.2 . . ? 
C18 C19 H19 118.9 . . ? 
C21 C20 C19 120.3(4) . . ? 
C21 C20 H20 119.9 . . ? 
C19 C20 H20 119.8 . . ? 
C20 C21 C22 119.8(3) . . ? 
C20 C21 H21 120.8 . . ? 
C22 C21 H21 119.4 . . ? 
C21 C22 C23 120.5(3) . . ? 
C21 C22 H22 121.3 . . ? 
C23 C22 H22 118.2 . . ? 
C22 C23 C18 120.4(3) . . ? 
C22 C23 H23 120.9 . . ? 
C18 C23 H23 118.7 . . ? 
C3 C24 H24A 111.3 . . ? 
C3 C24 H24B 108.4 . . ? 
H24A C24 H24B 109.5 . . ? 
C3 C24 H24C 108.7 . . ? 
H24A C24 H24C 109.5 . . ? 
H24B C24 H24C 109.5 . . ? 
C6' C1' C7' 111.2(3) . . ? 
C6' C1' C2' 111.0(3) . . ? 
C7' C1' C2' 110.5(3) . . ? 
C6' C1' H1' 107.8 . . ? 
C7' C1' H1' 108.7 . . ? 
C2' C1' H1' 107.5 . . ? 
C16' C2' C3' 108.9(3) . . ? 
C16' C2' C1' 109.6(3) . . ? 
C3' C2' C1' 111.2(3) . . ? 
C16' C2' H2' 110.3 . . ? 
C3' C2' H2' 108.4 . . ? 
C1' C2' H2' 108.3 . . ? 
C4' C3' C24' 111.5(3) . . ? 
C4' C3' C2' 110.8(3) . . ? 
C24' C3' C2' 111.2(3) . . ? 
C4' C3' H3' 107.5 . . ? 
C24' C3' H3' 108.3 . . ? 
C2' C3' H3' 107.4 . . ? 
C5' C4' C3' 112.0(3) . . ? 
C5' C4' H4'A 109.7 . . ? 
C3' C4' H4'A 109.0 . . ? 
C5' C4' H4'B 109.3 . . ? 
C3' C4' H4'B 108.2 . . ? 
H4'A C4' H4'B 108.4 . . ? 
C4' C5' C6' 109.9(3) . . ? 
C4' C5' H5'A 109.3 . . ? 
C6' C5' H5'A 108.0 . . ? 
C4' C5' H5'B 110.9 . . ? 
C6' C5' H5'B 110.3 . . ? 
H5'A C5' H5'B 108.3 . . ? 
C1' C6' C5' 112.2(3) . . ? 
C1' C6' H6'A 108.0 . . ? 
C5' C6' H6'A 107.6 . . ? 
C1' C6' H6'B 109.9 . . ? 
C5' C6' H6'B 111.0 . . ? 
H6'A C6' H6'B 108.0 . . ? 
C8' C7' C1' 115.4(3) . . ? 
C8' C7' H7'A 109.1 . . ? 
C1' C7' H7'A 108.2 . . ? 
C8' C7' H7'B 108.3 . . ? 
C1' C7' H7'B 108.0 . . ? 
H7'A C7' H7'B 107.6 . . ? 
O9' C8' C10' 119.7(3) . . ? 
O9' C8' C7' 121.3(3) . . ? 
C10' C8' C7' 119.0(3) . . ? 
C11' C10' C15' 118.9(3) . . ? 
C11' C10' C8' 119.2(3) . . ? 
C15' C10' C8' 122.0(3) . . ? 
C12' C11' C10' 120.3(3) . . ? 
C12' C11' H11' 120.6 . . ? 
C10' C11' H11' 119.0 . . ? 
C11' C12' C13' 120.5(3) . . ? 
C11' C12' H12' 119.1 . . ? 
C13' C12' H12' 120.4 . . ? 
C14' C13' C12' 119.6(4) . . ? 
C14' C13' H13' 120.0 . . ? 
C12' C13' H13' 120.4 . . ? 
C13' C14' C15' 120.4(4) . . ? 
C13' C14' H14' 119.5 . . ? 
C15' C14' H14' 120.1 . . ? 
C14' C15' C10' 120.3(3) . . ? 
C14' C15' H15' 120.8 . . ? 
C10' C15' H15' 118.9 . . ? 
O17' C16' C18' 118.6(3) . . ? 
O17' C16' C2' 118.3(3) . . ? 
C18' C16' C2' 123.1(3) . . ? 
C19' C18' C23' 118.8(3) . . ? 
C19' C18' C16' 118.7(3) . . ? 
C23' C18' C16' 122.4(3) . . ? 
C20' C19' C18' 121.3(3) . . ? 
C20' C19' H19' 120.0 . . ? 
C18' C19' H19' 118.7 . . ? 
C19' C20' C21' 119.5(4) . . ? 
C19' C20' H20' 119.9 . . ? 
C21' C20' H20' 120.6 . . ? 
C22' C21' C20' 120.6(3) . . ? 
C22' C21' H21' 119.8 . . ? 
C20' C21' H21' 119.6 . . ? 
C21' C22' C23' 119.8(4) . . ? 
C21' C22' H22' 119.8 . . ? 
C23' C22' H22' 120.4 . . ? 
C18' C23' C22' 120.0(4) . . ? 
C18' C23' H23' 119.6 . . ? 
C22' C23' H23' 120.4 . . ? 
C3' C24' H24D 110.8 . . ? 
C3' C24' H24E 108.5 . . ? 
H24D C24' H24E 109.5 . . ? 
C3' C24' H24F 109.1 . . ? 
H24D C24' H24F 109.5 . . ? 
H24E C24' H24F 109.5 . . ? 
 
loop_ 
 _geom_torsion_atom_site_label_1 
 _geom_torsion_atom_site_label_2 
 _geom_torsion_atom_site_label_3 
 _geom_torsion_atom_site_label_4 
 _geom_torsion 
 _geom_torsion_site_symmetry_1 
 _geom_torsion_site_symmetry_2 
 _geom_torsion_site_symmetry_3 
 _geom_torsion_site_symmetry_4 
 _geom_torsion_publ_flag 
C6 C1 C2 C16 -174.1(3) . . . . ? 
C7 C1 C2 C16 62.4(4) . . . . ? 
C6 C1 C2 C3 -53.2(4) . . . . ? 
C7 C1 C2 C3 -176.7(3) . . . . ? 
C16 C2 C3 C24 -59.9(4) . . . . ? 
C1 C2 C3 C24 178.3(3) . . . . ? 
C16 C2 C3 C4 175.8(3) . . . . ? 
C1 C2 C3 C4 54.0(4) . . . . ? 
C24 C3 C4 C5 179.7(3) . . . . ? 
C2 C3 C4 C5 -55.7(4) . . . . ? 
C3 C4 C5 C6 57.3(4) . . . . ? 
C4 C5 C6 C1 -56.9(4) . . . . ? 
C7 C1 C6 C5 177.3(3) . . . . ? 
C2 C1 C6 C5 54.2(4) . . . . ? 
C6 C1 C7 C8 70.0(4) . . . . ? 
C2 C1 C7 C8 -167.1(3) . . . . ? 
C1 C7 C8 O9 9.1(5) . . . . ? 
C1 C7 C8 C10 -172.0(3) . . . . ? 
O9 C8 C10 C15 172.2(3) . . . . ? 
C7 C8 C10 C15 -6.8(5) . . . . ? 
O9 C8 C10 C11 -7.3(5) . . . . ? 
C7 C8 C10 C11 173.8(3) . . . . ? 
C15 C10 C11 C12 0.7(5) . . . . ? 
C8 C10 C11 C12 -179.8(3) . . . . ? 
C10 C11 C12 C13 -0.2(6) . . . . ? 
C11 C12 C13 C14 -0.9(6) . . . . ? 
C12 C13 C14 C15 1.6(6) . . . . ? 
C13 C14 C15 C10 -1.1(6) . . . . ? 
C11 C10 C15 C14 -0.1(5) . . . . ? 
C8 C10 C15 C14 -179.5(3) . . . . ? 
C3 C2 C16 O17 -61.2(4) . . . . ? 
C1 C2 C16 O17 62.1(4) . . . . ? 
C3 C2 C16 C18 119.3(3) . . . . ? 
C1 C2 C16 C18 -117.3(3) . . . . ? 
O17 C16 C18 C23 -173.0(3) . . . . ? 
C2 C16 C18 C23 6.5(5) . . . . ? 
O17 C16 C18 C19 7.3(5) . . . . ? 
C2 C16 C18 C19 -173.3(3) . . . . ? 
C23 C18 C19 C20 -0.7(5) . . . . ? 
C16 C18 C19 C20 179.1(3) . . . . ? 
C18 C19 C20 C21 0.1(6) . . . . ? 
C19 C20 C21 C22 0.1(6) . . . . ? 
C20 C21 C22 C23 0.4(6) . . . . ? 
C21 C22 C23 C18 -1.0(6) . . . . ? 
C19 C18 C23 C22 1.1(5) . . . . ? 
C16 C18 C23 C22 -178.6(3) . . . . ? 
C6' C1' C2' C16' -173.9(3) . . . . ? 
C7' C1' C2' C16' 62.2(4) . . . . ? 
C6' C1' C2' C3' -53.4(4) . . . . ? 
C7' C1' C2' C3' -177.2(3) . . . . ? 
C16' C2' C3' C4' 174.6(3) . . . . ? 
C1' C2' C3' C4' 53.6(4) . . . . ? 
C16' C2' C3' C24' -60.8(4) . . . . ? 
C1' C2' C3' C24' 178.2(3) . . . . ? 
C24' C3' C4' C5' 179.5(3) . . . . ? 
C2' C3' C4' C5' -56.2(4) . . . . ? 
C3' C4' C5' C6' 57.3(4) . . . . ? 
C7' C1' C6' C5' 179.0(3) . . . . ? 
C2' C1' C6' C5' 55.6(4) . . . . ? 
C4' C5' C6' C1' -57.1(4) . . . . ? 
C6' C1' C7' C8' 69.9(4) . . . . ? 
C2' C1' C7' C8' -166.4(3) . . . . ? 
C1' C7' C8' O9' 8.4(5) . . . . ? 
C1' C7' C8' C10' -171.8(3) . . . . ? 
O9' C8' C10' C11' -7.7(5) . . . . ? 
C7' C8' C10' C11' 172.5(3) . . . . ? 
O9' C8' C10' C15' 172.3(3) . . . . ? 
C7' C8' C10' C15' -7.4(5) . . . . ? 
C15' C10' C11' C12' 0.0(5) . . . . ? 
C8' C10' C11' C12' -180.0(3) . . . . ? 
C10' C11' C12' C13' -0.2(6) . . . . ? 
C11' C12' C13' C14' 0.6(6) . . . . ? 
C12' C13' C14' C15' -0.9(6) . . . . ? 
C13' C14' C15' C10' 0.7(6) . . . . ? 
C11' C10' C15' C14' -0.2(5) . . . . ? 
C8' C10' C15' C14' 179.8(4) . . . . ? 
C3' C2' C16' O17' -59.4(4) . . . . ? 
C1' C2' C16' O17' 62.5(4) . . . . ? 
C3' C2' C16' C18' 119.9(3) . . . . ? 
C1' C2' C16' C18' -118.2(3) . . . . ? 
O17' C16' C18' C19' 3.5(5) . . . . ? 
C2' C16' C18' C19' -175.7(3) . . . . ? 
O17' C16' C18' C23' -177.2(3) . . . . ? 
C2' C16' C18' C23' 3.5(5) . . . . ? 
C23' C18' C19' C20' -1.5(6) . . . . ? 
C16' C18' C19' C20' 177.8(3) . . . . ? 
C18' C19' C20' C21' 0.7(6) . . . . ? 
C19' C20' C21' C22' 0.4(6) . . . . ? 
C20' C21' C22' C23' -0.5(6) . . . . ? 
C19' C18' C23' C22' 1.3(5) . . . . ? 
C16' C18' C23' C22' -178.0(3) . . . . ? 
C21' C22' C23' C18' -0.3(6) . . . . ? 
 
_diffrn_measured_fraction_theta_max    0.990 
_diffrn_reflns_theta_full              27.48 
_diffrn_measured_fraction_theta_full   0.990 
_refine_diff_density_max    0.225 
_refine_diff_density_min   -0.202 
_refine_diff_density_rms    0.053 
